# Supplementary material
Source: HighWire-hosted journal article supplement (https://bmjopen.bmj.com/content/13/2/e071141)
Supplement: inline-supplementary-material-1 [file inline-supplementary-material-1.pdf]

**Supplemental Figure 1: Study organizational structure**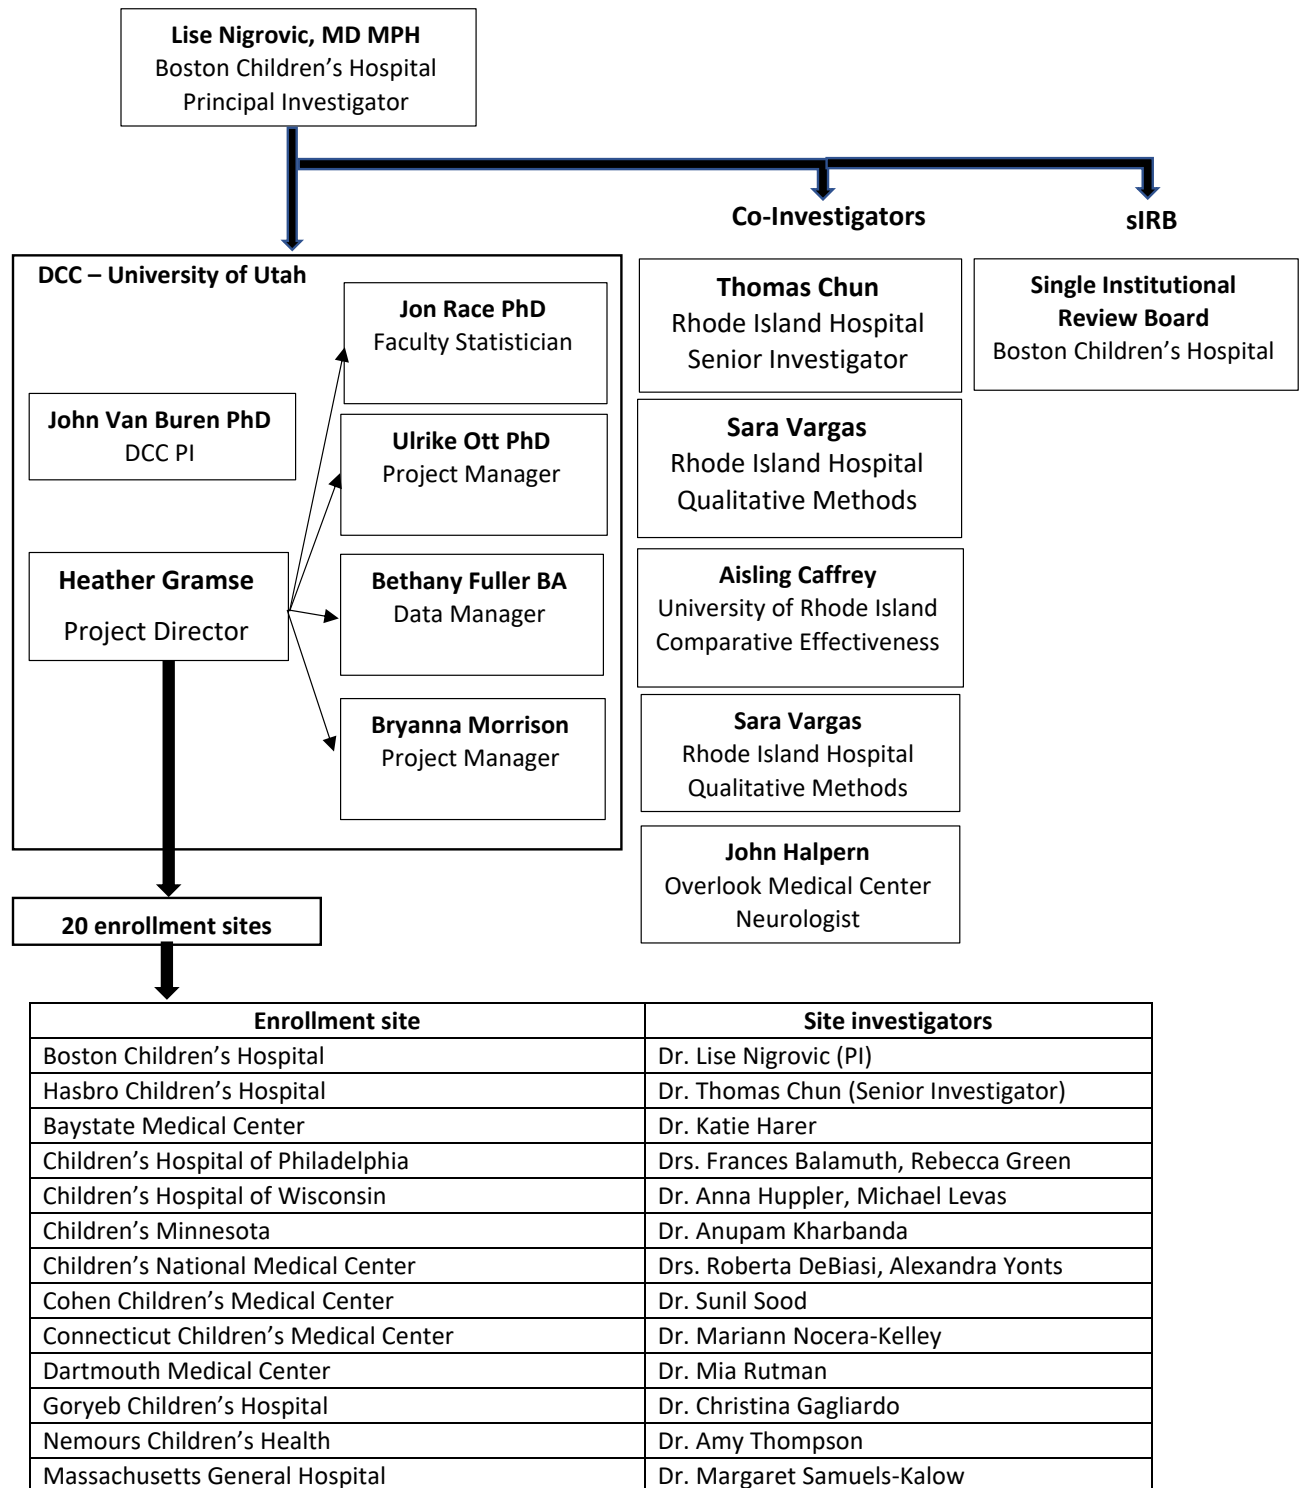

|                                                      |                                    |
|------------------------------------------------------|------------------------------------|
| Nationwide Children's Hospital                       | Drs. Daniel Cohen, Courtney Coyle  |
| Pennsylvania State University Hershey Medical Center | Dr. Kathryn Kasmire                |
| Stony Brook Children's Hospital                      | Drs. Andrew Handel, Sharon Nachman |
| UPMC Children's Hospital of Pittsburgh               | Dr. Desiree Neville                |
| University of Massachusetts                          | Dr. Christina Hermos               |
| Westchester Medical Center                           | Dr. Sheila Nolan                   |
| Yale New Haven Children's Hospital                   | Dr. Paul Aronson                   |
